# Supplementary material
Source: MDPI journal article supplement (https://www.mdpi.com/2076-3417/12/6/2988)
Supplement: s1 [file s1]

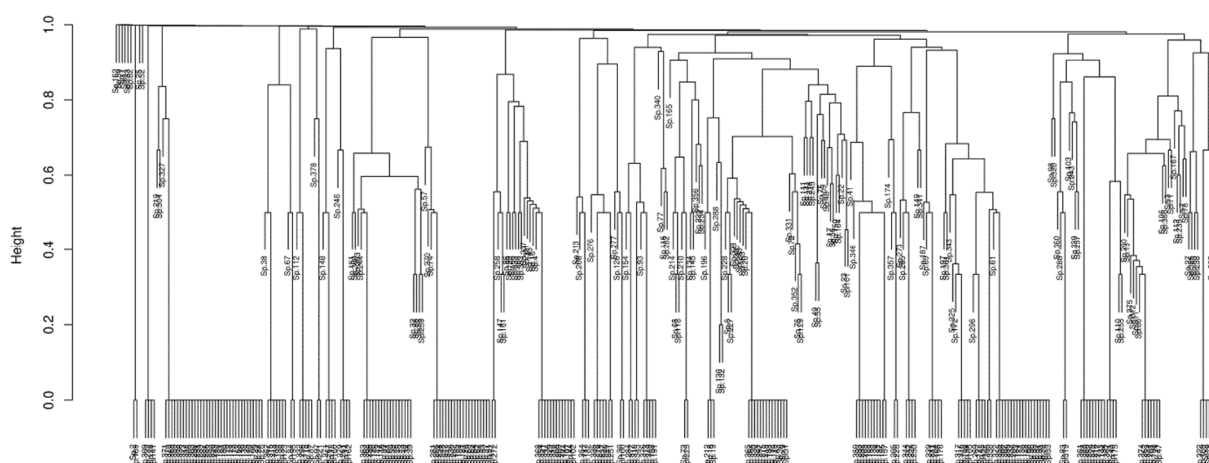

**Figure S1.** Cluster analysis on the Jaccard distance of the distribution of the different entries retrieved from the papers analyzed. The entries are reported as follows: Sp.1 *Acremoniella atra*; Sp.2 *Acremonium camptosporum*; Sp.3 *Acremonium charticola*; Sp.4 *Acremonium rutilum* (as *A. roseum*); Sp.5 *Acremonium masseei*; Sp.6 *Acremonium murorum* (also as *Gliomastix murorum*); Sp.7 *Acremonium* sp.; Sp.8 *Acrodontium crateriforme*; Sp.9 *Acrophialophora fusispora* (as *A. nainiana*); Sp.10 *Acrostalagmus luteoalbus* (as *Verticillium lateritium*); Sp.11 *Acrothecium* sp.; Sp.12 *Actinomucor elegans*; Sp.13 *Akanthomyces lecanii* (as *Verticillium lecanii*); Sp.14 *Allophoma labilis* (as *Phoma labilis*); Sp.15 *Alternaria angustiovoidea*; Sp.16 *Alternaria chartarum* (as *Ulocladium chartarum*); Sp.17 *Alternaria alternata* (also as *A. tenuis* and *Ulocladium alternariae*); Sp.18 *Alternaria dianthi*; Sp.19 *Alternaria longipes*; Sp.20 *Alternaria longissima*; Sp.21 *Alternaria oudemansii* (as *Ulocladium oudemansii*); Sp.22 *Alternaria tenuissima*; Sp.23 *Alternaria* sp. (also as *Ulocladium* sp.); Sp.24 *Amphinema* sp.; Sp.25 *Amyloporia sinuosa* (as *Antrodia sinuosa*); Sp.26 *Antrodia* sp.; Sp.27 *Apiotrichum* sp. (as *Hyalodendron* sp.); Sp.28 *Arachnomyces* sp.; Sp.29 *Armillaria* sp.; Sp.30 *Arthrinium arundinis*; Sp.31 *Arthrinium phaeospermum* (as *Papularia sphaerosperma*); Sp.32 *Arthrinium* sp.; Sp.33 *Arthrobotrys* sp.; Sp.34 *Ascochyta medicaginicola* (as *Phoma medicaginis*); Sp.35 *Ascochyta* sp.; Sp.36 *Ascotricha guamensis*; Sp.37 *Aspergillus aeneus*; Sp.38 *Aspergillus amstelodami* (also as *Eurotium amstelodami*); Sp.39 *Aspergillus aureolatus*; Sp.40 *Aspergillus auricomus*; Sp.41 *Aspergillus candidus*; Sp.42 *Aspergillus clavatus*; Sp.43 *Aspergillus creber*; Sp.44 *Aspergillus echinulatus*; Sp.45 *Aspergillus europaeus*; Sp.46 *Aspergillus flavipes*; Sp.47 *Aspergillus fischeri* (as *Neosartorya fischeri*); Sp.48 *Aspergillus flavus* (also as *A. oryzae*); Sp.49 *Aspergillus fumigatus*; Sp.50 *Aspergillus glaucus* group; Sp.51 *Aspergillus ivoriensis*; Sp.52 *Aspergillus japonicus*; Sp.53; *Aspergillus melleus*; Sp.54 *Aspergillus multicolor*; Sp.55 *Aspergillus nidulans* (also as *Emericella nidulans*); Sp.56 *Aspergillus niger*; Sp.57 *Aspergillus ochraceus*; Sp.58 *Aspergillus ostianus*; Sp.59 *Aspergillus pallidofulvus*; Sp.60 *Aspergillus parasiticus*; Sp.61 *Aspergillus penicilloides*; Sp.62 *Aspergillus petrakii*; Sp.63 *Aspergillus proliferans*; Sp.64 *Aspergillus protuberus*; Sp.65 *Aspergillus puniceus*; Sp.66 *Aspergillus repens*; Sp.67 *Aspergillus restrictus*; Sp.68 *Aspergillus sclerotiorum*; Sp.69 *Aspergillus spectabilis* (as *Emericella spectabilis*); Sp.70 *Aspergillus stellatus* (as *Emericella varicolor*); Sp.71 *Aspergillus sydowii*; Sp.72 *Aspergillus terreus*; Sp.73 *Aspergillus unguis*; Sp.74 *Aspergillus ustus*; Sp.75 *Aspergillus versicolor*; Sp.76 *Aspergillus wentii*; Sp.77 *Aspergillus* sp.; Sp.78 *Aureobasidium pullulans*; Sp.79 *Beauveria bassiana*; Sp.80 *Beauveria* sp.; Sp.81 *Bispora* sp.; Sp.82 *Bjerkandera adusta*; Sp.83 *Blastobotrys aristatus*; Sp.84 *Blastomyces* sp.; Sp.85 *Botrytis cinerea*; Sp.86 *Botryotrichum*

*atrogriseum*; Sp.87 *Botryotrichum domesticum*; Sp.88 *Botryotrichum murorum* (as *Chaetomium murorum*); Sp.89 *Brunneochlamydosporium nepalense* (as *Acremonium nepalense*); Sp.90 *Burgoa* sp.; Sp.91 *Candida takamatsuzukensis*; Sp.92 *Candida tumulicola*; Sp.93 *Candida* sp.; Sp.94 *Capronia coronata*; Sp.95 *Cephalotrichum verrucisporium* (as *Doratomyces verrucisporus*); Sp.96 *Cephalotrichum* sp. (as *Doratomyces*); Sp.97 *Capnobotryella erdogani*; Sp.98 *Cephalosporium* sp.; Sp.99 *Chaetomium ancistrocladum*; Sp.100 *Chaetomium elatum*; Sp.101 *Chaetomium globosum*; Sp.102; *Chaetomium piluliferum* (as *Botryotrichum piluliferum*); Sp.103 *Chaetomium* sp.; Sp.104 *Chondrostereum* sp.; Sp.105 *Chrysosporium pseudomerdarium*; Sp.106 *Chrysosporium* sp.; Sp.107 *Circinella muscae* (also as *Circinella sydowii*); Sp.108 *Cladophialophora tumulicola*; Sp.109 *Cladosporium cladosporioides*; Sp.110 *Cladosporium cucumerinum*; Sp.111 *Cladosporium herbarum*; Sp.112 *Cladosporium macrocarpum*; Sp.113 *Cladosporium sphaerospermum*; Sp.114 *Cladosporium uredinicola*; Sp.115 *Cladosporium xylophilum*; Sp.116 *Cladosporium* sp.; Sp.117 *Clonostachys rosea* (as *Gliocladium roseum*); Sp.118 *Cocliobolus geniculatus* (as *Curvulata geniculata*); Sp.119 *Collariella bostrychodes* (as *Chaetomium bostrychodes*); Sp.120 *Coltricia* sp.; Sp.121 *Coprinellus aokii* (as *Coprinus aokii*); Sp.122 *Coprinopsis atramentaria*; Sp.123 *Coprinopsis cothurnata* (as *Coprinus cothurnatus*); Sp.124 *Cordyceps farinosa* (as *Isaria farinosa*); Sp.125 *Corioloopsis* sp.; Sp.126 *Cunninghamella echinulata*; Sp.127 *Cunninghamella elegans*; Sp.128 *Cunninghamella* sp.; Sp.129 *Curvularia australiensis*; Sp.130 *Curvularia hawaiiensis* (as *Drechslera hawaiiensis*); Sp.131 *Curvularia lunata*; Sp.132 *Curvularia pallescens*; Sp.133 *Curvularia spicifera* (as *Drechslera spicifera*); Sp.134 *Curvularia* sp.; Sp.135 *Cutaneotrichosporon mucoides* (as *Trichosporon mucoides*); Sp.136 *Cylindrocarpon* sp.; Sp.137 *Cyphellophora olivacea*; Sp.138 *Cyphellophora* sp.; Sp.139 *Cyphellostereum* sp.; Sp.140 *Cystoderma* sp.; Sp.141 *Devriesia* sp.; Sp.142 *Drechslera* sp.; Sp.143 *Didymella glomerata* (as *Phoma glomerata*); Sp.144 *Dipodascus geotrichum* (also as *Geotrichum candidum*); Sp.145 *Dipodascus* sp. (as *Geotrichum* sp.); Sp.146 *Discostroma corticola* (as *Seimatosporium lichenicola*); Sp.147 *Emericella ruber*; Sp.148 *Emericella* sp.; Sp.149 *Engyodontium* sp.; Sp.150 *Epicoccum nigrum* (as *Epicoccum purpurascens*); Sp.151 *Epicoccum* sp.; Sp.152 *Eurotium halophylicum*; Sp.153 *Eurotium herbariorum*; Sp.154 *Eurotium* sp.; Sp.155 *Exophiala angulospora*; Sp.156 *Exophiala moniliae*; Sp.157 *Exophiala* sp.; Sp.158 *Filobasidiales*; Sp.159 *Fomitopsis vinosa*; Sp.160 *Fusarium chlamydosporum*; Sp.161 *Fusarium culmorum*; Sp.162 *Fusarium equiseti*; Sp.163 *Fusarium fujikuroi* (as *Fusarium moniliforme*); Sp.164 *Fusarium oxysporum*; Sp.165 *Fusarium proliferatum*; Sp.166 *Fusarium sporotrichioides*; Sp.167 *Fusarium* sp.; Sp.168 *Fuscoporia* sp.; Sp.169 *Fusidium viridae*; Sp.170 *Ganoderma* sp.; Sp.171 *Gliomastix tumulicola* (as *Acremonium tumulicola*); Sp.172 *Gliomastix* sp.; Sp.173 *Gloiothele* sp.; Sp.174 *Helminthosporium* sp.; Sp.175 *Humicola fuscoatra*; Sp.176 *Humicola udagawae*; Sp.177 *Humicola* sp.; Sp.178 *Hyphodontia alutaria*; Sp.179 *Hyphodontia* sp.; Sp.180 *Hyphodontiella* sp.; Sp.181 *Hypholoma* sp.; Sp.182 *Idriella* sp.; Sp.183 *Kendrickiella phycomyces*; Sp.184 *Kernia geniculotricha*; Sp.185 *Kernia hippocrepeida*; Sp.186 *Lactarius* sp.; Sp.187 *Lecanicillium psalliotae*; Sp.188 *Lecanicillium* sp.; Sp.189 *Leptobacillium muralicola*; Sp.190 *Leptosphaeria* sp.; Sp.191 *Leptosphaerulina* sp.; Sp.192 *Leucosphaerina indica* (as *Acremonium indicum*); Sp.193 *Macrophomina phaseolina*; Sp.194 *Malbranchea* spp.; Sp.195 *Mammaria echinobotryoides*; Sp.196 *Memnoniella* sp.; Sp.197 *Metapochonia bulbillosa* (as *Verticillium bulbillosum*); Sp.198 *Metapochonia suchlasporia* (as *Verticillium suchlasporium*); Sp.199 *Meyerozyma guilliermondii*; Sp.200 *Microascus brevicaulis* (as *Scopulariopsis brevicaulis*); Sp.201 *Microascus chartarum* (as *Scopulariopsis chartarum*); Sp.202 *Microascus cirrosus*; Sp.203 *Microascus* sp.; Sp.204 *Microdochium lycopodium*; Sp.205 *Monilinia* sp. (as *Monilia* sp.); Sp.206 *Monocillium*-like sp.; Sp.207 *Monodictys castaneae* (as *Stemphylium macrosporoideum*); Sp.208 *Monodictys* sp.; Sp.209 *Mucor plumbeus* (as *Mucor spinosus*); Sp.210

*Mortierella alpina*; Sp.211 *Mortierella ambigua*; Sp.212 *Mortierella parvispora* (as *M. gracilis*); Sp.213 *Mortierella* sp.; Sp.214 *Mucor racemosus*; Sp.215 *Mucor silvaticus*; Sp.216 *Mucor* sp.; Sp.217 *Myxotrichum stipitatum*; Sp.218 *Myxotrichum* sp.; Sp.219 *Nectria* sp.; Sp.220 *Neocosmospora solani* (as *Fusarium solani*); Sp.221 *Neodevriesia modesta* (as *Devriesia modesta*); Sp.222 *Neodevriesia* sp.; Sp.223 *Neosartorya* sp.; Sp.224 *Neosetophoma cerealis* (as *Coniothyrium cerealis*); Sp.225 *Neurospora intermedia*; Sp.226 *Neurospora* sp.; Sp.227 *Nigrospora oryzae* (as *N. sphaerica*); Sp.228 *Nigrospora* sp.; Sp.229 *Ochroconis tshawytschae*; Sp.230 *Oidiodendron cereale*; Sp.231 *Oidiodendron tenuissimum*; Sp.232 *Ophiostoma* sp.; Sp.233 *Paecilomyces variotii*; Sp.234 *Paecilomyces* sp.; Sp.235 *Parengyodontium album* (as *Beauveria alba*, *Tritirachium album*, and *Engyodontium album*); Sp.236 *Penicillium aethiopicum*; Sp.237 *Penicillium albicans*; Sp.238 *Penicillium aurantiogriseum* (also as *P. verrucosum* var. *cyclopium*); Sp.239 *Penicillium brevicompactum*; Sp.240 *Penicillium camemberti*; Sp.241 *Penicillium canescens* (as *P. raciborski*); Sp.242 *Penicillium carneum*; Sp.243 *Penicillium chrysogenum*; Sp.244 *Penicillium citreonigrum* (as *P. citreoviride*); Sp.245 *Penicillium citrinum*; Sp.246 *Penicillium commune*; Sp.247 *Penicillium concentricum*; Sp.248 *Penicillium coprobium*; Sp.249 *Penicillium corylophilum*; Sp.250 *Penicillium daleae*; Sp.251 *Penicillium decumbens*; Sp.252 *Penicillium dierckxii* (as *Penicillium fellutanum*); Sp.253 *Penicillium digitatum*; Sp.254 *Penicillium dipodomyicola*; Sp.255 *Penicillium expansum*; Sp.256 *Penicillium fuscoglaucum*; Sp.257 *Penicillium glabrum* (also as *P. frequentans*); Sp.258 *Penicillium granulatum*; Sp.259 *Penicillium griseofulvum*; Sp.260 *Penicillium herquei*; Sp.261 *Penicillium italicum*; Sp.262 *Penicillium javanicum* (as *Eupenicillium javanicum*); Sp.263 *Penicillium lanosum*; Sp.264 *Penicillium lilacinum*; Sp.265 *Penicillium meleagrinum*; Sp.266 *Penicillium miczynskii*; Sp.267 *Penicillium olsonii*; Sp.268 *Penicillium oxalicum*; Sp.269 *Penicillium pancosmium*; Sp.270 *Penicillium paneum*; Sp.271 *Penicillium polonicum*; Sp.272 *Penicillium purpurescens*; Sp.273 *Penicillium purpurogenum*; Sp.274 *Penicillium restrictum*; Sp.275 *Penicillium rubrilinum*; Sp.276 *Penicillium simplicissimum* (as *P. janthinellum*); Sp.277 *Penicillium spinulosum* (as *P. nigricans*); Sp.278 *Penicillium thomii*; Sp.279 *Penicillium turbatum*; Sp.280 *Penicillium verrucosum*; Sp.281 *Penicillium vulpinum*; Sp.282 *Penicillium* sp.; Sp.283 *Pestalotia* sp.; Sp.284 *Pezizomycotina*; Sp.285 *Phialophora* sp.; Sp.286 *Phlebia* sp.; Sp.287 *Pholiota* sp.; Sp.288 *Phoma* sp.; Sp.289 *Physalacria* sp.; Sp.290 *Pleospora* sp.; Sp.291 *Postia* sp.; Sp.292 *Preussia terricola*; Sp.293 *Preussia* sp.; Sp.294 *Pseudogymnoascus pannorum* (as *Geomyces pannorum* and *Chrysosporium pannorum*); Sp.295 *Pseudozyma prolifica*; Sp.296 *Purpureocillium lilacinus* (as *Paecilomyces lilacinus*); Sp.297 *Pyrenophora biseptata* (as *Drechslera biseptata*); Sp.298 *Radulomyces* sp.; Sp.299 *Rhinocladiella*-like; Sp.300 *Rhizoctonia solani* (also as *Thanatephorus cucumeris*); Sp.301 *Rhizopus stolonifer* (also as *R. nigricans*); Sp.302 *Rhodotorula glutinis*; Sp.303 *Rhodotorula mucilaginosa*; Sp.304 *Rhodotorula* sp.; Sp.305 *Rhizopus* sp.; Sp.306 *Russula* sp.; Sp.307 *Sagenomella griseoviridis*; Sp.308 *Sagenomella striatispora*; Sp.309 *Sagenomella* sp.; Sp.310 *Sarocladium bacillisporum* (as *Acremonium bacillisporum*); Sp.311 *Sarocladium kiliense* (also as *Acremonium kiliense*); Sp.312 *Sarocladium strictum* (as *Acremonium* cfr. *strictum*); Sp.313 *Schizophyllum commune*; Sp.314 *Schizophyllum* sp.; Sp.315 *Schizopora paradoxa* (as *Hyphodontia paradoxa*); Sp.316 *Scolecobasidium anomalum* (as *Ochroconis anomala*); Sp.317 *Scolecobasidium lascauxensis*; Sp.318 *Scopulariopsis brevicaulis*; Sp.319 *Scopulariopsis fusca*; Sp.320 *Scopulariopsis* sp.; Sp.321 *Scytalidium* sp.; Sp.322 *Simplicillium lamellicola* (as *Verticillium lamellicola*); Sp.323 *Skeletocutis* sp.; Sp.324 *Sordaria humana*; Sp.325 *Sphaerostilbella* sp. (as *Gliocladium* sp.); Sp.326 *Sporotrichum* sp.; Sp.327 *Sporothrix* sp.; Sp.328 *Stachybotrys chartarum* (as *S. atra*); Sp.329 *Stachybotrys cylindrosporus*; Sp.330 *Stachybotrys echinatus* (as *Memnoniella echinata*); Sp.331 *Stachybotrys* sp.; Sp.332 *Stagonosporopsis lupini*; Sp.333 *Stemphylium botryosum*; Sp.334 *Stemphylium pyriforme*; Sp.335 *Stemphylium* sp.; Sp.336 *Stereum* sp.;

Sp.337 *Syncephalastrum* sp.; Sp.338 *Talaromyces aculeatus*; Sp.339 *Talaromyces flavus*; Sp.340 *Talaromyces pinophilus* (as *Penicillium pinophilum*); Sp.341 *Talaromyces rugulosus* (as *Penicillium rugulosum*); Sp.342 *Talaromyces variabilis* (as *Penicillium variabile*); Sp.343 *Thysanorea papuana*; Sp.344 *Tilletiopsis* sp.; Sp.345 *Torrubiella alba* (as *Lecanicillium araneorum*); Sp.346 *Torrubiella* sp.; Sp.347 *Torula herbarum*; Sp.348 *Torula* sp.; Sp.349 *Tricharina* sp.; Sp.350 *Trichocladium asperum*; Sp.351 *Trichothecium roseum*; Sp.352 *Trichoderma harzianum*; Sp.353 *Trichoderma viride*; Sp.354 *Trichoderma virens* (as *Gliocladium virens*); Sp.355 *Trichoderma* sect. *longibrachiatum*; Sp.356 *Trichoderma* sp.; Sp.357 *Tritirachium* sp.; Sp.358 *Tubaria* sp.; Sp.359 *Tyromyces* sp.; Sp.360 *Umbellopsis ramanniana* (as *Mortierella ramanniana*); Sp.361 Undetermined yeasts; Sp.362 Uredinales; Sp.363 Ustilaginales; Sp.364 *Venturia carpophila* (as *Cladosporium carpophilum*); Sp.365 *Verticillium alboatrum*; Sp.366 *Verticillium* sp.; Sp.367 *Wallemia sebi*; Sp.368 *Wallemia* sp.; Sp.369 *Xylodon nespoli*; Sp.370 *Xylodon nothofagi*; Sp.371 *Xylodon raduloides*; Sp.372 *Zygosporium masoni*; Sp.373 *Westerdykella* sp.; Sp.374 Hyaline sterile mycelia; Sp.375 Melanized sterile mycelia; Sp.376 Basidiomycota; Sp.377 Chaetomiaceae; Sp.378 Meristematic fungi.
